# Supplementary material
Source: PubMed Central journal article supplement (PMC5785763)
Supplement: oc7b00502_si_001.pdf [file oc7b00502_si_001.pdf]

## Electronic Supplementary Information

### **When NiO@Ni Meets WS<sub>2</sub> Nanosheet Array: A Highly Efficient and Ultra-Stable Electrocatalyst for Overall Water Splitting**

Dewen Wang,<sup>†,‡</sup> Qun Li,<sup>†,‡</sup> Ce Han<sup>†</sup>, Zhicai Xing,<sup>\*,†</sup> and Xiurong Yang<sup>\*,†</sup>

<sup>†</sup>State Key Laboratory of Electroanalytical Chemistry, Changchun Institute of Applied Chemistry, Chinese Academy of Sciences, Changchun 130022, Jilin, China

<sup>‡</sup>University of Science and Technology of China, Hefei 230026, China

\*E-mail: xingzc@ciac.ac.cn; xryang@ciac.ac.cn

## **Experimental Section**

### **Materials**

CC was purchased from Hongshan District, Wuhan Instrument Surgical Instruments Business, China.  $\text{Na}_2\text{WO}_4 \cdot 2\text{H}_2\text{O}$ , HCl,  $\text{H}_2\text{C}_2\text{O}_4$ , KOH,  $(\text{NH}_4)_2\text{SO}_4$  and  $\text{NiSO}_4 \cdot 6\text{H}_2\text{O}$  were purchased from Beijing Chemical Corp. Pt/C (20 wt% Pt on Vulcan XC-72R), Nafion (5 wt%) and  $\text{RuO}_2$  were purchased from Sigma–Aldrich. Powdered sulfur was purchased from Alfa Aesar. All chemicals were used as received without further purification. The water used throughout all experiments was purified through a Millipore system.

### **Synthesis of $\text{WO}_3/\text{CC}$**

$\text{WO}_3/\text{CC}$  was synthesized according to previously reported method.<sup>1</sup>

### **Synthesis of $\text{WS}_2/\text{CC}$**

The as obtained  $\text{WO}_3/\text{CC}$  was put in a porcelain boat and powdered sulfur (1g) was put in another porcelain boat, then put them in a tube furnace and calcined at 600 °C for 2 h with temperature rise speed of 10 °C  $\text{min}^{-1}$  under Ar atmosphere. After the tube furnace cooled down to room temperature, the  $\text{WS}_2/\text{CC}$  could be taken out, and the loading of  $\text{WS}_2/\text{CC}$  was 18.8  $\text{mg cm}^{-2}$ .

### **Synthesis of $\text{NiO@Ni/WS}_2/\text{CC}$**

The electrodeposition of Ni on  $\text{WS}_2/\text{CC}$  was carried out in a three-electrode cell ( $\text{WS}_2/\text{CC}$ , working electrode; a graphite plate, counter electrode; Ag/AgCl, reference electrode). The electrodeposition was performed by cyclic voltammetry over the potential window of -0.2 to -1.4 V (cycles: 30; scan rate: 50  $\text{mV s}^{-1}$ ) in 0.1 M

$\text{Ni}_2\text{SO}_4 \cdot 6\text{H}_2\text{O}$  aqueous solution. All these procedures were carried out at 25 °C under nitrogen protection. After electrodeposition, Ni/WS<sub>2</sub>/CC was removed, rinsed by deionized water, and dried in the oven at 80 °C for 30 min for obtaining NiO@Ni/WS<sub>2</sub>/CC, the eventually loading of NiO@Ni/WS<sub>2</sub> was 21.6 mg cm<sup>-2</sup>. The reference sample, NiO@Ni/CC (loading: 2.8 mg cm<sup>-2</sup>), was prepared through a similar method using CC as the working electrode, Ni/WS<sub>2</sub>/CC was prepared without drying and NiO/WS<sub>2</sub>/CC was prepared through drying in the oven at 200 °C for 60 min.

### **Materials characterizations**

Powder XRD data were acquired with a RigakuD/MAX 2550 diffractometer with Cu K $\alpha$  radiation ( $\lambda=1.5413$ ). SEM measurements were performed with a XL30 ESEM FEG microscope at an accelerating voltage of 20 kV. TEM measurements were made with a Hitachi H-8100 electron microscope (Hitachi, Tokyo, Japan) with an accelerating voltage of 200 kV. XPS measurements were performed with an ESCALABMK II X-ray photoelectron spectrometer by using Mg as the exciting source. Raman data was obtained on lab RAM ARAMIS Raman spectrometer with 785 nm wavelength incident laser light. X-ray absorption fine structure (XAFS) spectroscopy experiment was carried out at 1W2B end station, Beijing Synchrotron Radiation Facility (BSRF). The Ni K-edge and W K-edge spectra were collected at room temperature in transmission mode. The BET surface area was measured on a Quantachrome NOVA 1000 system at liquid N<sub>2</sub> temperature.

### **Electrochemical measurements**

All electrochemical measurements were performed with a CHI660D electrochemical analyzer (CH Instruments, Inc., Shanghai) at room temperature. NiO@Ni/WS<sub>2</sub>/CC was directly used as the working electrode, a saturated calomel electrode (SCE) as the reference electrode, and graphite rod as the counter electrode. Potentials were referenced to a reversible hydrogen electrode (RHE) by adding a value of (0.242 + 0.059 pH) V. RuO<sub>2</sub> and Pt/C ink was prepared by dispersing 10 mg of RuO<sub>2</sub> or Pt/C in 500  $\mu$ L of ethanol with 5  $\mu$ L of 5 wt % Nafion solution, then the catalyst ink was loaded onto CC surface and air-dried at room temperature. The ohmic potential drop (*iR*) losses that arise from the solution resistance were all corrected. Tafel plots of the overpotential vs. log (current density) are recorded with the linear portions at low overpotential fitted to the Tafel equation ( $\eta = a + b \log j$ , where  $\eta$  is the overpotential,  $j$  is the cathodic current density, and  $b$  is the Tafel slope). The stability test of the NiO@Ni/WS<sub>2</sub>/CC was also performed using a typical three electrodes system. The capacitances of the double layer ( $C_{dl}$ ) at the solid–liquid interface of materials were measured by CVs collecting between -0.1 V and -0.2 V vs RHE in 1.0 M KOH, where the current response should be only due to the charging of the double layer.

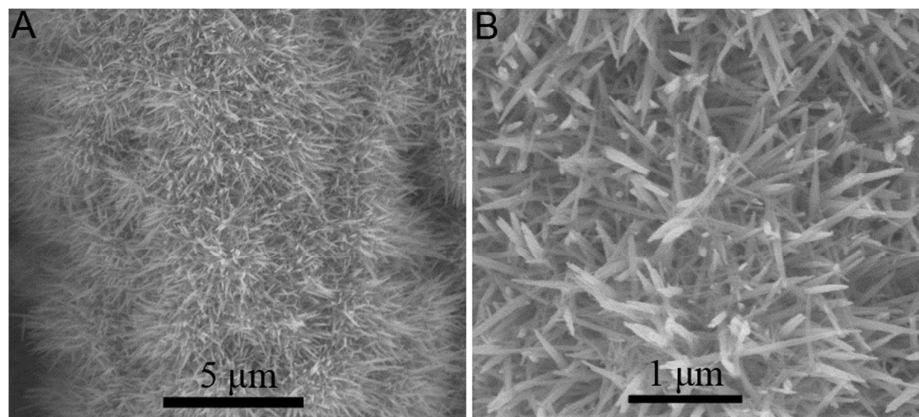

**Figure S1.** The SEM images of  $\text{WO}_3/\text{CC}$  nanowires at (A) low and (B) high magnification.

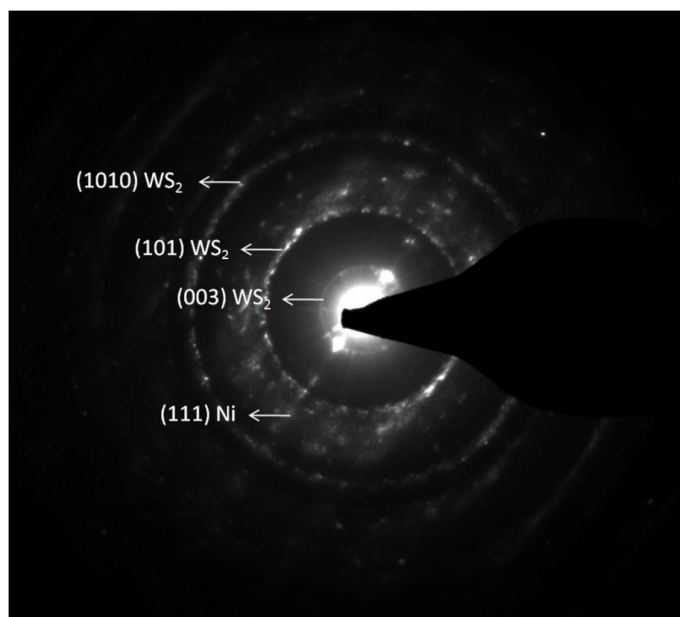

**Figure S2.** SAED pattern of  $\text{NiO}@\text{Ni}/\text{WS}_2$ .

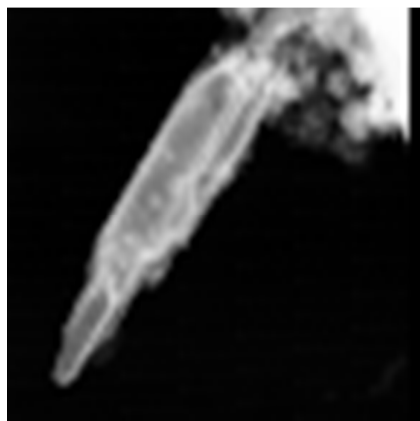

**Figure S3.** STEM image of a NiO@Ni/WS<sub>2</sub> nanosheet.

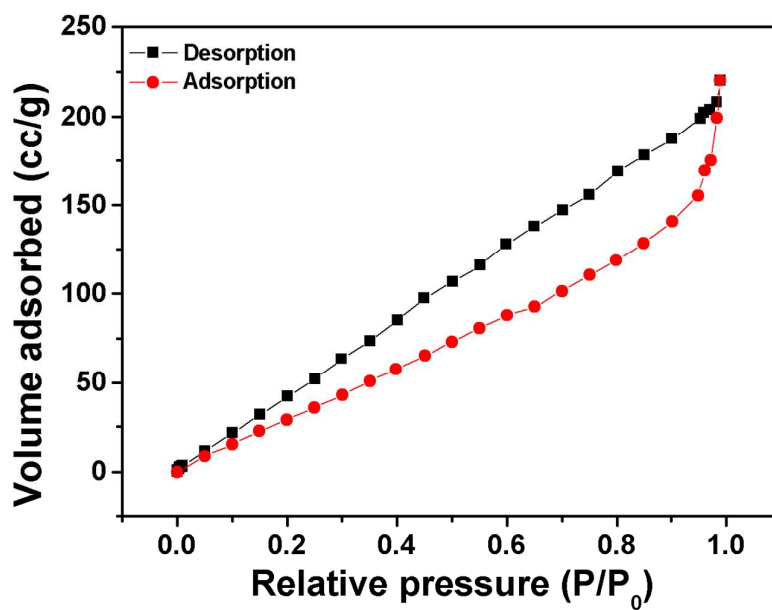

**Figure S4.** Nitrogen adsorption/desorption isotherm of the NiO@Ni/WS<sub>2</sub>/CC electrocatalyst.

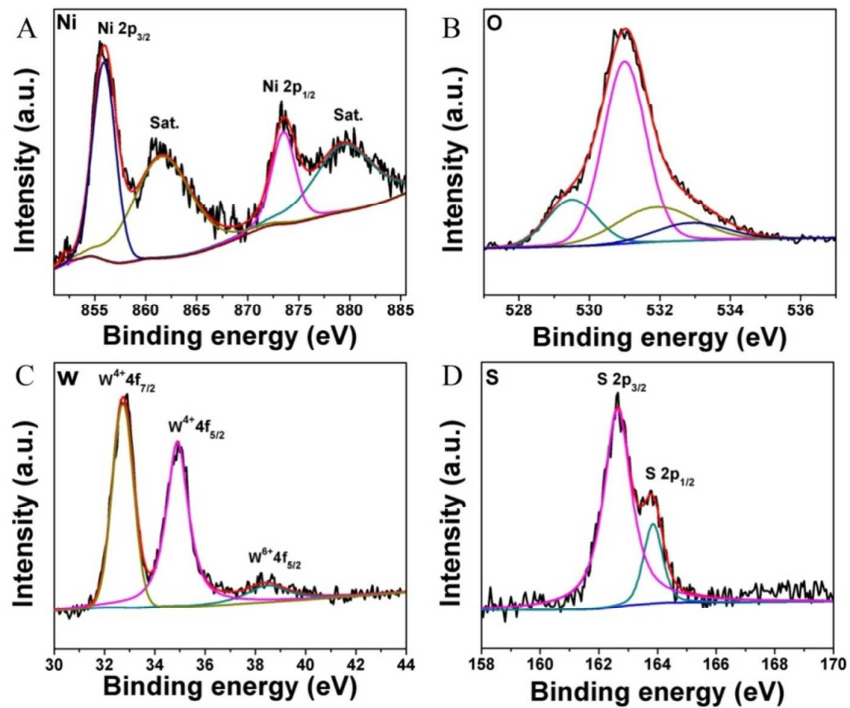

Figure S5. XPS spectra in the (A) Ni 2p, (B) O 1s, (C) W 4f and (D) S 2p regions for

NiO@Ni/WS<sub>2</sub>/CC.

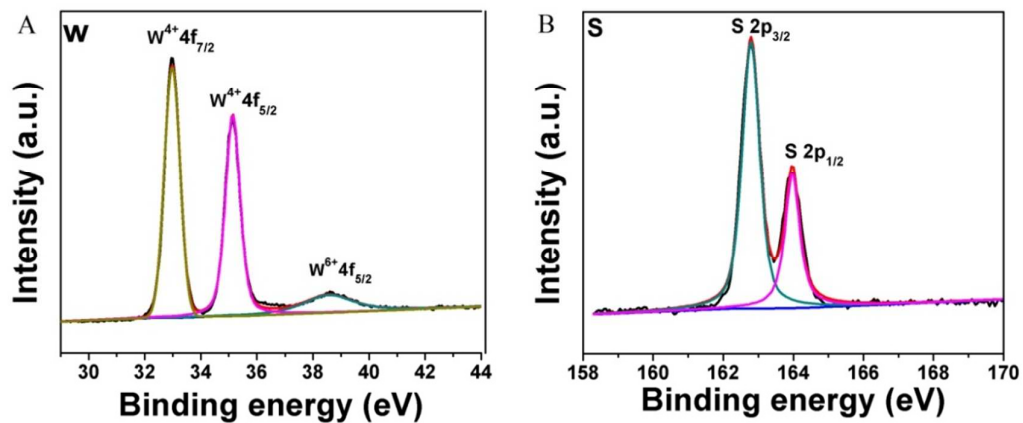

Figure S6. XPS spectra in the (A) W 4f and (B) S 2p regions for WS<sub>2</sub>/CC.

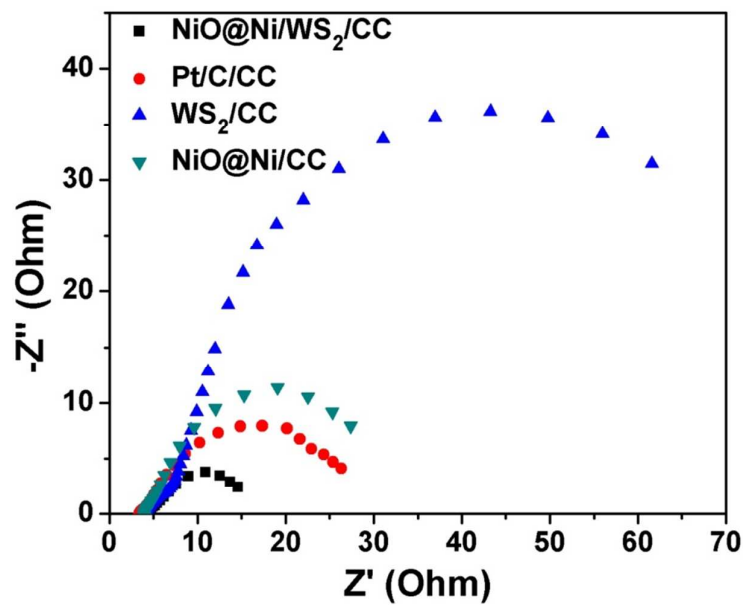

**Figure S7.** Nyquist plots of electrochemical impedance spectra of NiO@Ni/WS<sub>2</sub>/CC, Pt/C/CC, WS<sub>2</sub>/CC and NiO@Ni/CC at overpotential of 60 mV.

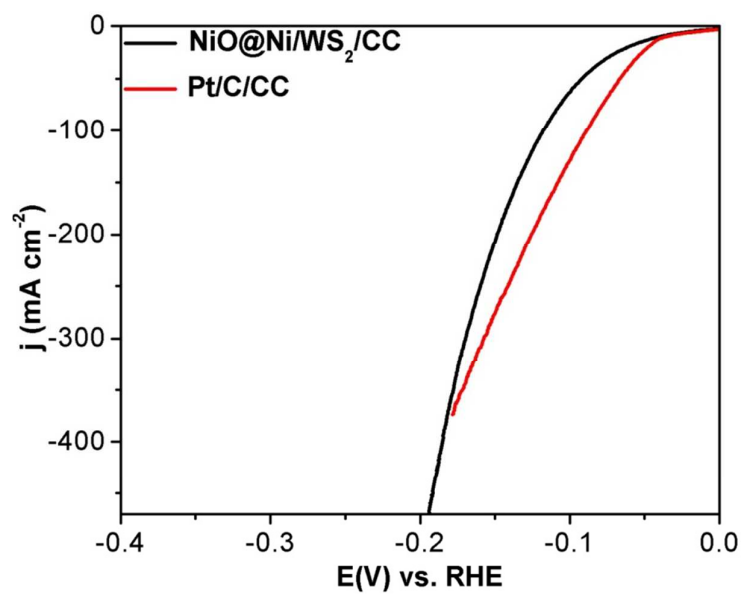

**Figure S8.** LSV curves for NiO@Ni/WS<sub>2</sub>/CC and Pt/C/CC at a scan rate of 5 mV s<sup>-1</sup> for HER.



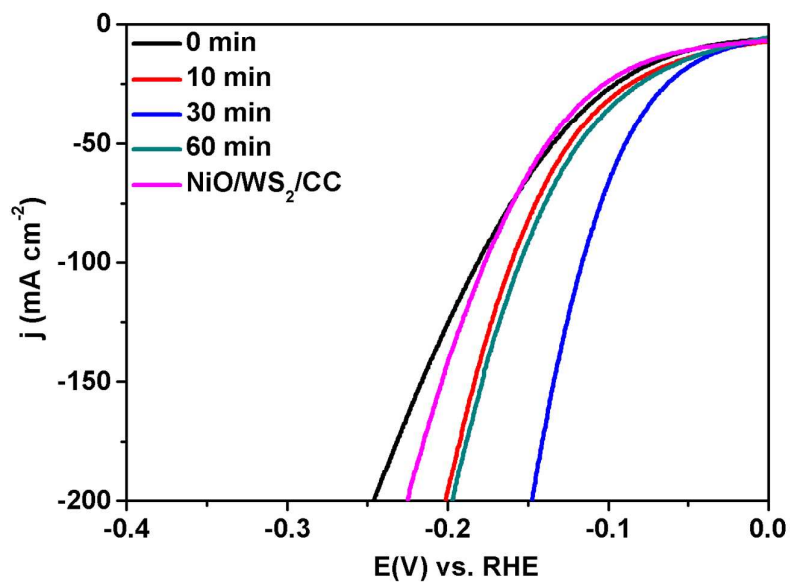

**Figure S9.** LSV curves for NiO/WS<sub>2</sub>/CC at different oxidation times and NiO/WS<sub>2</sub>/CC with a scan rate of 5 mVs<sup>-1</sup> for HER.

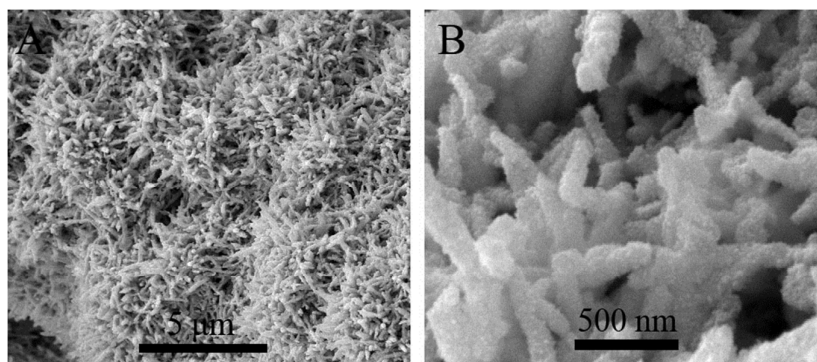

**Figure S10.** The SEM images of NiO@Ni/WS<sub>2</sub>/CC at (A) low and (B) high magnification after HER electrolysis.

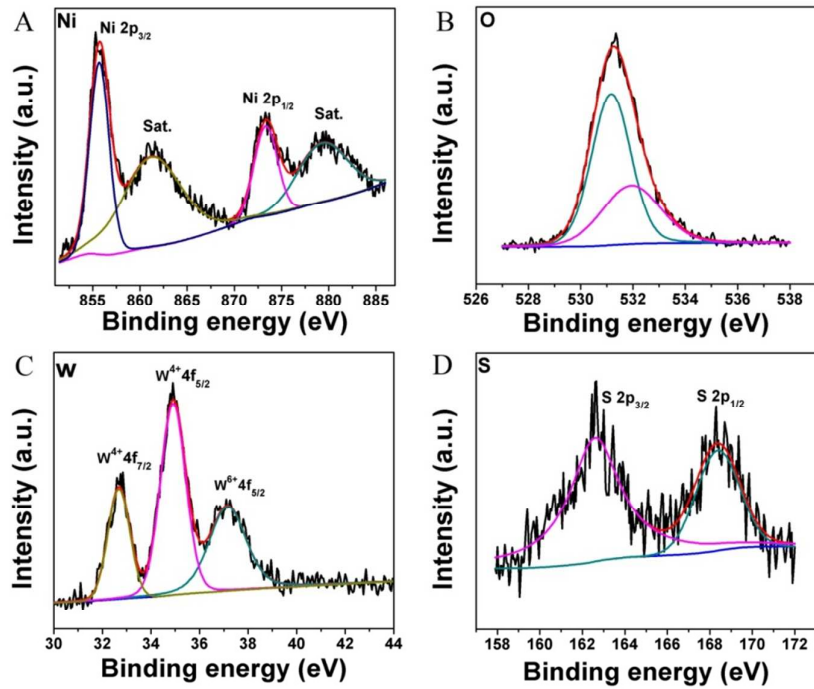

**Figure S11.** XPS survey spectra of NiO@Ni/WS<sub>2</sub>/CC for post-HER test (A) Ni 2p, (B) O 1s, (C) W 4f and (D) S 2p.

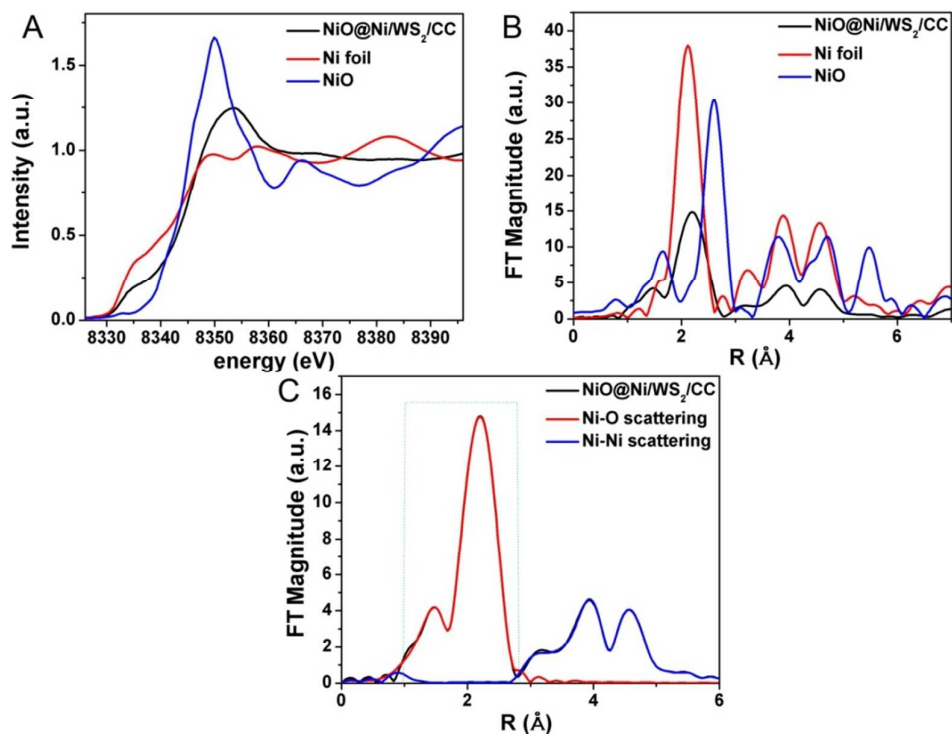

**Figure S12.** (A) Ni K-edge XANES spectra and (B) Fourier transforms of k<sub>3</sub>-weighted Ni K-edge EXAFS spectra for NiO@Ni/WS<sub>2</sub>/CC after HER test, Ni foil, and NiO. (C) Observed (black line) and calculated (red and blue line) Fourier transforms of k<sub>3</sub>-weighted Ni K-edge EXAFS spectra for NiO@Ni/WS<sub>2</sub>/CC after HER test.

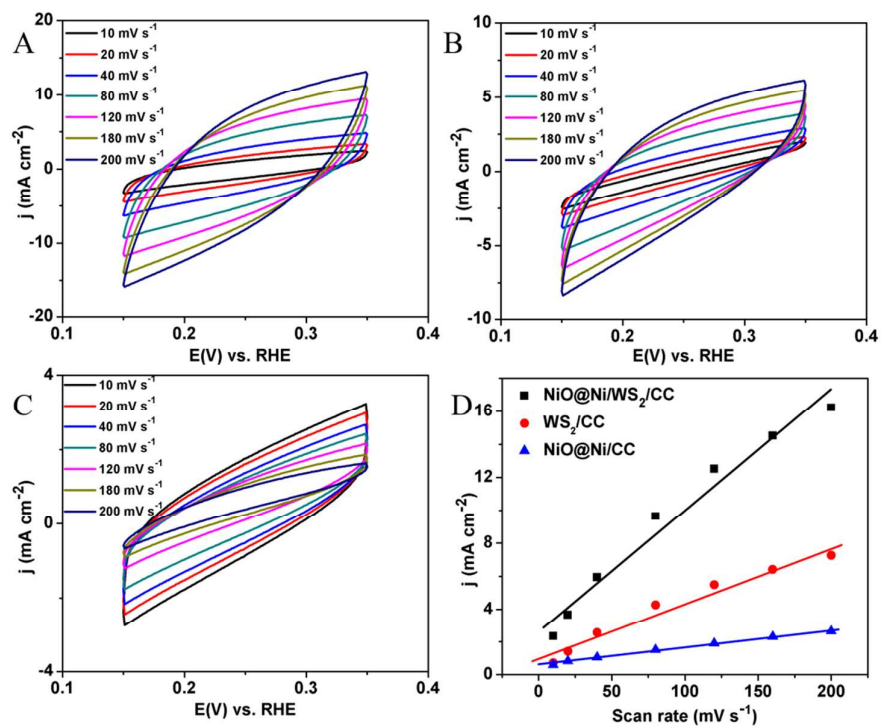

**Figure S13.** CVs for (A) NiO@Ni/WS<sub>2</sub>/CC, (B) WS<sub>2</sub>/CC and (C) NiO@Ni/CC. (D)

The corresponding capacitive currents at 0.25 V as a function of scan rate for

NiO@Ni/WS<sub>2</sub>/CC, WS<sub>2</sub>/CC and NiO@Ni/CC.

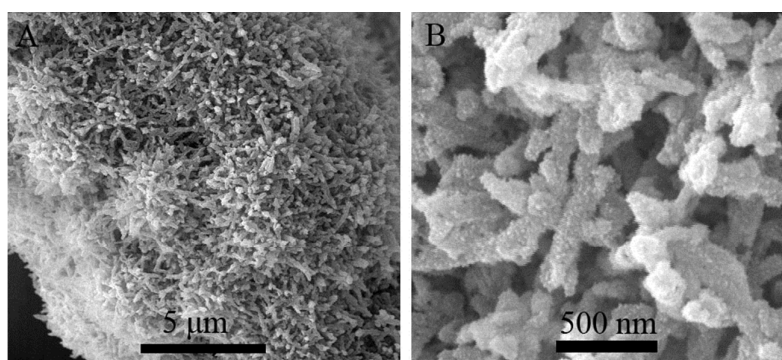

**Figure S14.** SEM images of NiO@Ni/WS<sub>2</sub>/CC at (A) low and (B) high magnification after OER electrolysis.

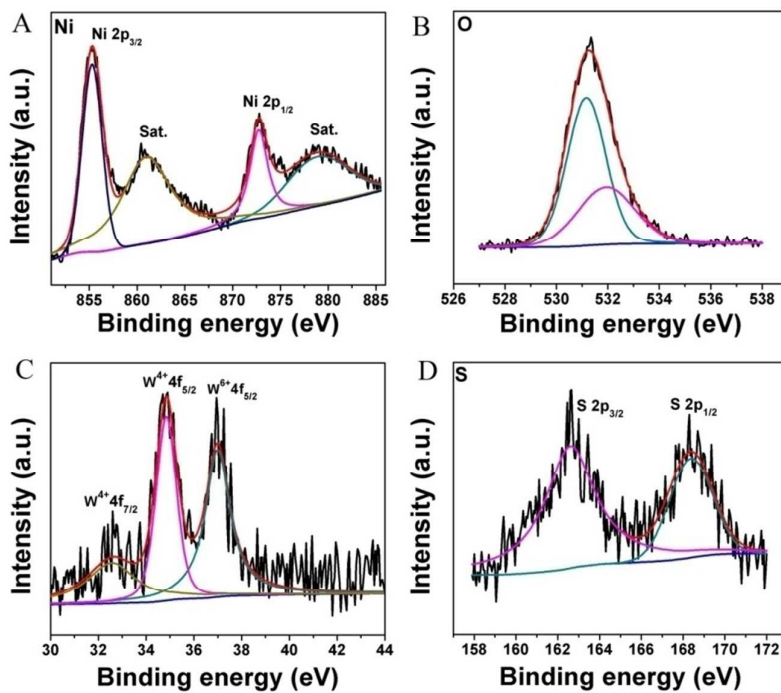

**Figure S15.** XPS survey spectra of NiO@Ni/WS<sub>2</sub>/CC for post-OER test (A) Ni 2p, (B)

O 1s, (C) W 4f and (D) S 2p.

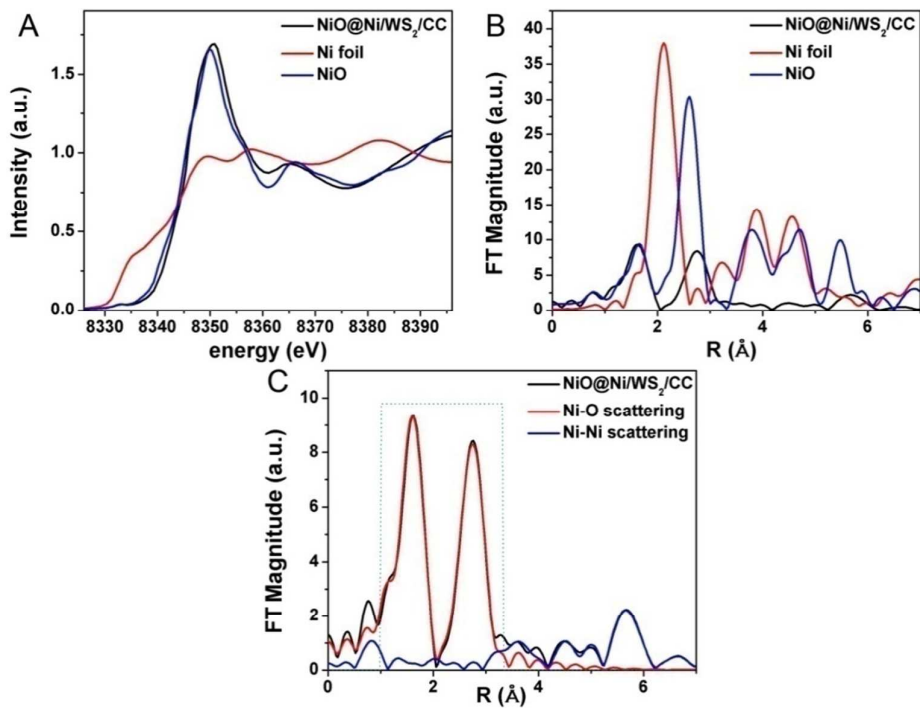

**Figure S16.** (A) Ni K-edge XANES spectra and (B) Fourier transforms of k<sub>3</sub>-weighted Ni K-edge EXAFS spectra for NiO@Ni/WS<sub>2</sub>/CC after OER test, Ni foil and NiO. (C) Observed (black line) and calculated (red and blue line) Fourier transforms of k<sub>3</sub>-weighted Ni K-edge EXAFS spectra for NiO@Ni/WS<sub>2</sub>/CC after OER test.

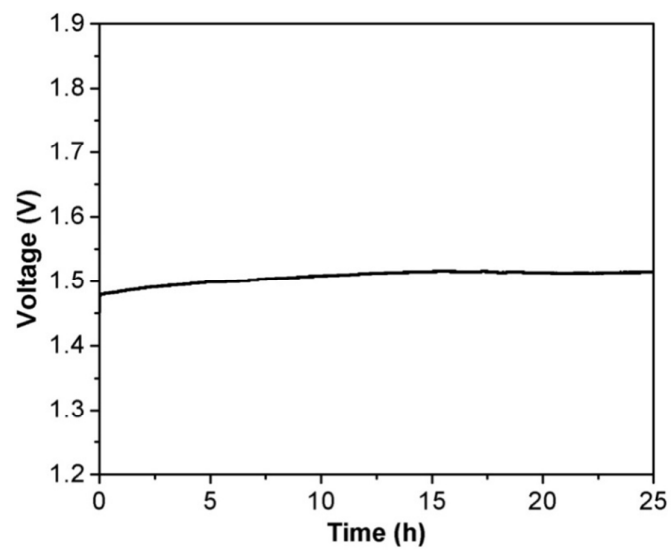

**Figure S17.** Chronopotentiometric curve of water electrolysis for

NiO@Ni/WS<sub>2</sub>/CC||NiO@Ni/WS<sub>2</sub>/CC with a constant current density of 10 mA cm<sup>-2</sup>.

**Table S1** EXAFS fitting parameters at the Ni K-edge for various samples.

| Sample                                      | Shell                        | $N^a$ | $R(\text{\AA})^b$ | $\sigma^2(\text{\AA}^2 \cdot 10^3)^c$ | $\Delta E^0(\text{eV})^d$ | R factor (%) |
|---------------------------------------------|------------------------------|-------|-------------------|---------------------------------------|---------------------------|--------------|
| NiO@Ni/WS <sub>2</sub> /CC                  | Ni–O                         | 1.8   | 2.04              | 7.5                                   | -4.1                      | 1.07         |
|                                             | Ni–Ni<br>(O-bridged)         | 7.2   | 2.48              | 6.8                                   | -6.6                      |              |
| NiO@Ni/WS <sub>2</sub> /CC<br>post-HER test | Ni–O                         | 2.4   | 1.87              | 8.0                                   | -9.0                      | 0.20         |
|                                             | Ni–S                         | 1.3   | 2.31              | 2.0                                   | 8.8                       |              |
|                                             | Ni–Ni<br>(O-bridged)         | 3.5   | 2.56              | 5.7                                   | 10.0                      |              |
| NiO@Ni/WS <sub>2</sub> /CC<br>post-OER test | Ni–O                         | 6.6   | 2.05              | 6.3                                   | -3.7                      | 0.36         |
|                                             | Ni–Ni<br>(O-bridged)         | 6.5   | 3.09              | 9.0                                   | -1.1                      |              |
| NiO                                         | Ni–O                         | 6.0   | 2.08              | 7.4                                   | -2.5                      | 1.55         |
|                                             | Ni–Ni<br>(O-bridged)         | 12.0  | 2.95              | 6.5                                   |                           |              |
| Ni-foil                                     | Ni–Ni (in metallic state Ni) | 12    | 2.48              | 5.9                                   | -6.1                      | 1.92         |

$N^a$ : coordination numbers;  $R(\text{\AA})^b$ : bond distance;  $\sigma^2(\text{\AA}^2 \cdot 10^3)^c$ : Debye-Waller factors;  $\Delta E^0(\text{eV})^d$ : the inner potential correction.  $S_0^2$  for Ni–Ni is 0.92, For Ni–O is 0.88, were obtained from the experimental EXAFS fit of Ni-foil/NiO references by fixing CN as the known crystallographic value and were fixed to all the samples.



**Table S2** Comparison of selected non-noble metal based HER electrocatalysts in alkaline media.

| Catalysts                    | Electrolyte | $j$ (mA cm <sup>-2</sup> ) | $\eta$ (mV) | Reference                                               |
|------------------------------|-------------|----------------------------|-------------|---------------------------------------------------------|
| NiO@Ni/WS <sub>2</sub> /CC   | 1 M KOH     | 10                         | 40          | This work                                               |
|                              |             | 20                         | 60          |                                                         |
|                              |             | 100                        | 117         |                                                         |
| Co-P film                    | 1 M KOH     | 10                         | 94          | <i>Angew. Chem. Int. Ed.</i><br><b>2015</b> , 54, 6251. |
|                              |             | 20                         | 115         |                                                         |
|                              |             | 100                        | 158         |                                                         |
| Ni <sub>2</sub> P            | 1 M KOH     | 20                         | 205         | <i>J. Am. Chem. Soc.</i><br><b>2013</b> , 135, 9267.    |
| Fe-CoP/Ti                    | 1 M KOH     | 10                         | 78          | <i>Adv. Mater.</i><br><b>2017</b> , 29, 1602441.        |
|                              |             | 100                        | 164         |                                                         |
| NiO/Ni-CNT                   | 1 M KOH     | 10                         | ~100        | <i>Nat. Commun.</i><br><b>2014</b> , 5, 4695.           |
| CoO <sub>x</sub> @CN hybrids | 1 M KOH     | 10                         | 200         | <i>J. Am. Chem. Soc.</i><br><b>2015</b> , 137, 2688.    |
| Amorphous MoS <sub>x</sub>   | 1 M KOH     | 10                         | 540         | <i>Chem. Sci.</i><br><b>2011</b> , 2, 1262.             |
| Ni-Mo nanopowder             | 1 M NaOH    | 10                         | 80          | <i>ACS Catal.</i><br><b>2013</b> , 3, 166.              |
| MnNi                         | 1 M KOH     | 10                         | 360         | <i>Adv. Funct. Mater.</i><br><b>2015</b> , 25, 393.     |

**Table S3** Comparison of selected non-noble metal based OER electrocatalysts in alkaline media.

| Catalysts                               | Electrolyte | $j$ (mA cm <sup>-2</sup> ) | $\eta$ (mV)                | Reference                                                |
|-----------------------------------------|-------------|----------------------------|----------------------------|----------------------------------------------------------|
| NiO@Ni/WS <sub>2</sub> /CC              | 1.0 M KOH   | 50                         | 347                        | this work                                                |
| NiFeO <sub>x</sub> film                 | 1.0 M NaOH  | 10                         | >350                       | <i>J. Am. Chem. Soc.</i><br><b>2013</b> , 135, 16977.    |
| Fe-Ni oxides                            | 1.0 M KOH   | 10                         | >375                       | <i>ACS Catal.</i><br><b>2012</b> , 2, 1793.              |
| Ni-Co-mixed oxide nanocages             | 1.0 M KOH   | 10                         | ~380                       | <i>Adv. Mater.</i><br><b>2016</b> , 28, 4601.            |
| NiCo LDH                                | 1.0 M KOH   | 10                         | 367                        | <i>Nano Lett.</i><br><b>2015</b> , 15, 1421.             |
| MnO <sub>x</sub> /Au                    | 0.1 M KOH   | 10                         | >480                       | <i>J. Am. Chem. Soc.</i><br><b>2014</b> , 136, 4920.     |
| Ni <sub>3</sub> S <sub>2</sub> /Ni      | 1.0 M KOH   | 10                         | 187                        | <i>Energy Environ. Sci.</i><br><b>2013</b> , 6, 2921.    |
| Ni-doped Co <sub>3</sub> O <sub>4</sub> | 1.0 M KOH   | 10                         | 530                        | <i>Chem. commun.</i><br><b>2013</b> , 49, 7522.          |
| NG-NiCo                                 | 1.0 M KOH   | ~                          | Onset overpotential 0.35 V | <i>Angew. Chem. Int. Ed.</i><br><b>2013</b> , 52, 13567. |

**Table S4** Comparison of selected non-noble metal based bifunctional electrocatalysts in alkaline media.

| Catalysts                      | Electrolyte | $j$ (mA cm <sup>-2</sup> ) | $\eta$ (V) | Reference                                                |
|--------------------------------|-------------|----------------------------|------------|----------------------------------------------------------|
| NiO@Ni/WS <sub>2</sub> /CC     | 1 M KOH     | 10                         | 1.42       | This work                                                |
| NiSe                           | 1 M KOH     | 10                         | 1.63       | <i>Angew. Chem. Int. Ed.</i><br><b>2015</b> , 54, 9351.  |
| Ni <sub>5</sub> P <sub>4</sub> | 1 M KOH     | 10                         | 1.70       | <i>Angew. Chem. Int. Ed.</i><br><b>2015</b> , 54, 12361. |
| Ni <sub>2</sub> P              | 1 M KOH     | 10                         | 1.63       | <i>Energy Environ. Sci.</i><br><b>2015</b> , 8, 2347.    |
| CoMnO@CN                       | 1 M KOH     | 10                         | ~1.5       | <i>J. Am. Chem. Soc.</i><br><b>2015</b> , 137, 14305.    |
| CoO <sub>x</sub> @CN hybrids   | 1 M KOH     | 20                         | 1.55       | <i>J. Am. Chem. Soc.</i><br><b>2015</b> , 137, 2688.     |
| CoNi(OH) <sub>x</sub>          | 1 M KOH     | 11                         | 1.65       | <i>Adv. Energy Mater.</i><br><b>2016</b> , 6, 1501661.   |
| Co-P film                      | 1 M KOH     | 100                        | 1.744      | <i>Angew. Chem. Int. Ed.</i><br><b>2015</b> , 54, 6251.  |
| CoP <sub>2</sub> /RGO          | 1 M KOH     | 10                         | 1.56       | <i>J. Mater. Chem. A.</i><br><b>2016</b> , 4, 4686.      |

**Reference:**

1. Gao, L.; Wang, X.; Xie, Z.; Song, W.; Wang, L.; Wu, X.; Qu, F.; Chen, D.; Shen, G. High-performance energy-storage devices based on WO<sub>3</sub> nanowire arrays/carbon cloth integrated electrodes. *J. Mater. Chem. A* **2013**, *1*, 7167–7173.
